# Supplementary material
Source: publisher site journal article supplement (https://www.dovepress.com/article/227477)
Supplement: Supplementary file 1 [file get_supplementary_file.php]

**Appendix 1** Inclusion and exclusion criteria

| Inclusion criteria: |
| --- |
| 1. Age ranges from 14 to 70 years old.  2. Histological confirmed diffuse large B cell lymphoma with at least one measurable lesion as defined by Cheson criteria;  3. An Eastern Cooperative Oncology Group(ECOG) performance status of 0-2;  4. An expected survival of ≥ 3 months;  5. Have taken and failed at least two prior chemotherapy regimens (We define treatment failure as disease progression or intolerable adverse events);  Note: (1)Patients accomplished no less than one full cycle for any line of treatment. (2) We allow for targeted drug combined with chemotherapy in previous treatments;  6. Major organ function meet the following criteria;  (1) Blood routine test (without blood transfusion within 14 days):  a. absolute neutrophil count (ANC) ≥ 1.5 × 109 / L  b. haemoglobin concentration (HB) ≥ 8.0g/dL  c. platelet count (PLT) ≥ 75 × 109 / L  (2) Biochemical tests results:  a. total bilirubin <1.5 times the upper limit of normal (ULN)  b. alanine aminotransferase (ALT) and aspartate aminotransferase (AST) <2.0×ULN;  c. Serum Cr ≤ 1×ULN, endogenous creatinine clearance(Ccr) >50ml/min (by Cockcroft-Gault formula)  7. Pregnancy test (serum or urine) of women at reproductive age must be negative.  8. Patient has to join the study voluntarily and sign the informed consent for the study. 9. Be willing to comply with follow-up procedures. |
| Exclusion criteria: |
| 1. Suffering from other malignancies previously (except for cured basal cell carcinoma and cervical carcinoma in situ) or coexisting malignancies currently;  2. Patients with unmanageable hypertension (systolic blood pressure≥140 mmHg/diastolic blood pressure ≥ 90 mmHg and cannot be controlled successfully by drugs), unstable angina or heart failure with cardiac function higher than grade II as defined by the New York Heart Association (NYHA);  3. High gastrointestinal bleeding risk, including: active ulcerative lesions with occult blood test positive; history of black stool, melena or hematemesis history within 3 months before this study;  Note: an endoscope examination was needed for patients with primary gastrointestinal DLBCL whose occult blood test were positive.  4. Factors that could interfere with oral medication (such as inability to swallow, chronic diarrhea and intestinal obstruction);  5. Abnormal Coagulation function (INR>1.5、APTT>1.5 UNL), with tendency of bleed  6. Associated with CNS (central nervous system) metastases;  7. 24 hours urinary protein excretion ≥ 1.0g;  8. Allergic of any of drug in this regimen or with metabolic disorder;  9. Participated in other clinical study within 4 weeks;  10. Prior treatment with VEGFR inhibitors;  11. Serious concomitant medical illness likely to interfere with participation judged by investigators.  12. Patients estimated to be unsuitable by investigator. |
| Drop out/removal criteria： |
| 1. Patients do not follow the study protocol.  2. Application of any CFDA approved anti-tumor traditional Chinese medicine or other relative treatments including immunotherapy. (Anti-bone metastasis therapy and other supportive symptomatic treatments are allowed.) |
| Discontinue criteria： |
| 1. Patients withdraw with informed consent;  2. Confirmed disease progression;  3. Pregnancy during the study;  4. Intolerable toxicity even after 3 times of dose reduction;  5. Other conditions that investigators believe it is necessary to withdraw a patient from the study. |

**Appendix 2** Comparison of clinical characteristics of Apatinib and other noval agents for RR DLBCL lymphoma

| **Agent** | **Study** | **N** | **ORR** | **PFS** | **OS** |
| --- | --- | --- | --- | --- | --- |
| Apatinib | This study | 32 | 43.8% | 6.9 months | 7.9 months |
| Nivolumab | Ansell et al | 11 | 10% for ASCT-ineligible group; 3% for ASCT-failed group | 1.4 months for ASCT-ineligible group; 1.9 months for ASCT-failed group | 5.8 months for ASCT-ineligible group; 12.2 months for ASCT-failed group |
| Ibrutinib | Wilson et al | 38(ABC subtype) | 37% | 2.0 months | 10.3 months |
| Copanlisib | Lenz et al | 16(ABC subtype) | 37.5% | - | - |
|  |  | 22(GCB subtype) | 13.6% | - | - |
| Polatuzumab-vedotin | Palanca-Wessels et al | 25 | 56% | - | - |
| Venetoclax | Davids et al | 18 | 18% | 1.0 months | 1-year OS 32% |
| Obinotuzumab | Morschhauser et al | 25 | 32% in the 1,600/800-mg group and 24% in the 400/400-mg group | - | - |
| Lenalidomide | Czuczman et al | 54 | 27.5% | 3.4 months | 7.8 months |
| CAR-T | Neelapu et al | 108 | 42.0% | 5.8 months | Not reached |
